# Supplementary material for: Morphology dependence of molybdenum disulfide transparent counter electrode in dye-sensitized solar cells
Source: Royal Society of Chemistry journal article supplement (doi:10.1039/c3ta14313a), 2013-12-17
Supplement: c3ta14313a.pdf [file c3ta14313a.pdf]

Electronic Supplementary Material (ESI) for

**Morphology dependence of molybdenum disulfide transparent  
counter electrode in dye-sensitized solar cells**

B. Lei, G. R. Li\* and X. P. Gao

Institute of New Energy Material Chemistry, Synergetic Innovation Center of Chemical  
Science and Engineering (Tianjin), Tianjin Key Laboratory of Metal and Molecule Based  
Material Chemistry, Nankai University, Tianjin 300071, China

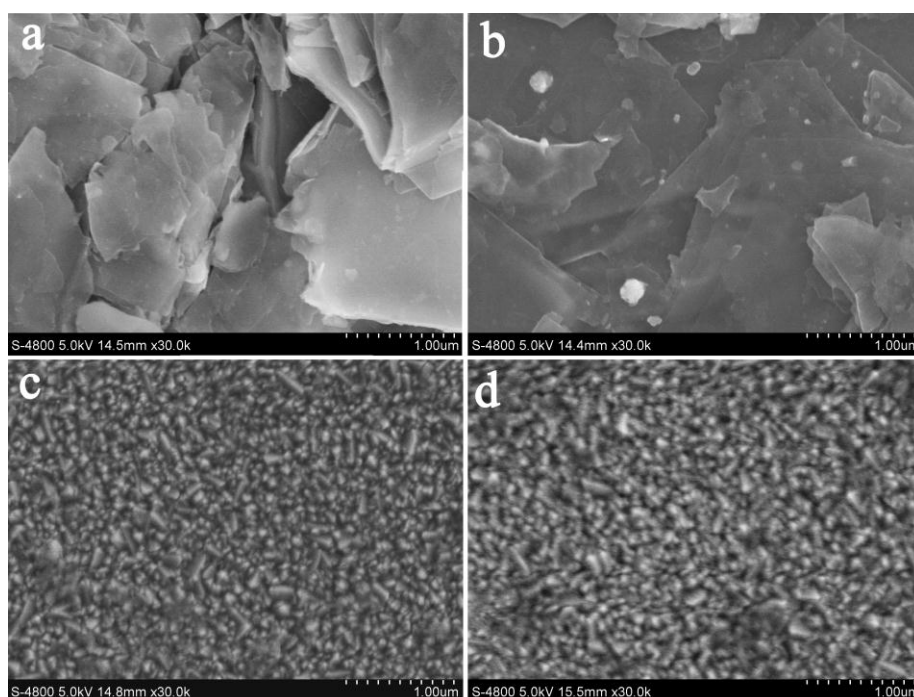

**Fig. 1S** Surface SEM images of the counter electrodes made of ML-MoS<sub>2</sub> (a), FL-MoS<sub>2</sub> (b), MoS<sub>2</sub>-NPs (c) and Pt (d).
